## ANESTHESIOLOGY

# Defining the Minimal Clinically Important Difference and Patient-acceptable Symptom State Score for Disability Assessment in Surgical Patients

Mark A. Shulman, M.B., B.S., M.P.H., F.A.N.Z.C.A.,  
Jessica Kasza, B.Sc., Ph.D., Paul S. Myles, M.B., B.S.,  
M.P.H., M.D., D.Sc., F.C.A.I., F.A.N.Z.C.A., F.R.C.A.

*ANESTHESIOLOGY* 2020; 132:1362–70

## EDITOR'S PERSPECTIVE

### What We Already Know about This Topic

- The World Health Organization Disability Assessment Schedule 2.0 is finding widespread adoption as a patient-centered outcome measure in clinical studies
- The minimal clinically important difference and patient-acceptable disability score for patients undergoing surgery remain poorly understood

### What This Article Tells Us That Is New

- Using previously collected data from three studies across 4,361 patients, a 5% change in score after surgery is clinically important
- Patients with a scaled disability score less than 16% after surgery have an acceptable symptom state and can be considered as disability-free

There is increasing recognition that clinical trials should measure outcomes that are important to patients.<sup>1,2</sup> The patient-centered outcomes subgroup of the Standardised EndPoints in Perioperative Medicine (StEP-COMPAC) working group has recommended that the 12-item World Health Organization Disability Assessment Schedule 2.0

## ABSTRACT

**Background:** The World Health Organization Disability Assessment Schedule 2.0 has been used to measure postoperative disability in several clinical trials and cohort studies. It is uncertain what the minimal clinically important difference or patient-acceptable symptom state scores are for this scale in patients recovering from surgery.

**Methods:** The authors analyzed prospectively collected data from three studies that measured disability 3 and 6 months after surgery. Three distribution-based methods (0.3 multiplied by SD, standard error of the measurement, and 5% range) and two anchor-based methods (anchored to two patient-rated health status questions and separately to unplanned hospital readmission) were averaged to estimate the minimal clinically important difference for the World Health Organization Disability Assessment Schedule 2.0 score converted to a percentage scale. Scores consistent with a patient-acceptable symptom state and clinically significant disability were determined by an anchored 75th centile method.

**Results:** Data from 4,361 patients were analyzed. The average minimal clinically important difference estimate for the World Health Organization Disability Assessment Schedule 2.0 was 5%, with similar estimates in patients with or without preoperative disability. The patient-acceptable symptom state score was 16%, and the score consistent with at least moderate clinically significant disability was 35%. Using these estimates, between baseline and 6 months after surgery, 21% of patients had a significant increase in disability, and 73% achieved a patient-acceptable symptom state.

**Conclusions:** A change in World Health Organization Disability Assessment Schedule 2.0 score of 5% or more after surgery is consistent with a clinically important change in disability. Patients with a score less than 16% after surgery have an acceptable symptom state and can be considered as disability-free, whereas patients with a score of 35% or more can be considered as having at least moderate clinically significant disability.

(*ANESTHESIOLOGY* 2020; 132:1362–70)

(WHODAS) should be included as a measure of functional status in clinical trials. WHODAS has undergone extensive psychometric evaluation in a diverse surgical population<sup>3</sup> and has since been used as a primary or secondary endpoint in several clinical trials and cohort studies.<sup>4–7</sup>

Key metrics of a patient-rated scale, such as WHODAS, include the minimal clinically important difference, and the patient-acceptable symptom state.<sup>8</sup> The minimal clinically important difference is the smallest change in score on a given scale that corresponds to a meaningful change in clinical state from the patient's perspective,<sup>9,10</sup> whereas the patient-acceptable symptom state refers to a threshold score on the scale beyond which patients consider themselves to be well.<sup>11,12</sup>

This article is featured in "This Month in Anesthesiology," page 1A. This article is accompanied by an editorial on p. 1296. Supplemental Digital Content is available for this article. Direct URL citations appear in the printed text and are available in both the HTML and PDF versions of this article. Links to the digital files are provided in the HTML text of this article on the Journal's Web site ([www.anesthesiology.org](http://www.anesthesiology.org)). This article has an audio podcast. This article has a visual abstract available in the online version.

Submitted for publication April 15, 2019. Accepted for publication February 12, 2020. Published online first on March 10, 2020. From the Department of Anaesthesiology and Perioperative Medicine (M.A.S.) and the Department of Anaesthesiology and Perioperative Medicine (P.S.M.), Alfred Hospital and Monash University, Melbourne, Victoria, Australia; and the School of Public Health and Preventive Medicine, Monash University, Melbourne, Victoria, Australia (J.K.).

Copyright © 2020, the American Society of Anesthesiologists, Inc. All Rights Reserved. *Anesthesiology* 2020; 132:1362–70. DOI: 10.1097/ALN.0000000000003240

Until now we have used data and recommendations from nonsurgical populations<sup>13,14</sup> to estimate a change in WHODAS score consistent with the minimal clinically important difference (8%) and an absolute WHODAS score (at least 25%) consistent with significant disability.<sup>3</sup> These estimates need to be confirmed in a surgical cohort. Furthermore, a WHODAS 25% cutoff refers to patients with at least moderate disability and therefore does not represent a patient-acceptable state.

The aim of this study was to determine the minimal clinically important difference and patient-acceptable symptom state for the WHODAS score. In addition, a secondary objective was to determine the WHODAS score that is consistent with at least moderate or clinically significant disability in a surgical population.

## Materials and Methods

This study combined prospectively collected data from two previously published and one ongoing perioperative medicine studies, all measuring disability using WHODAS:

- (1) The REstrictive *versus* LIBeral Fluid Therapy in Major Abdominal Surgery (RELIEF) Study was an international multicenter randomized controlled trial that enrolled 2,983 patients undergoing major abdominal surgery to a restrictive or liberal fluid therapy regimen.<sup>4</sup> The primary endpoint of RELIEF was disability-free survival 12 months after surgery.
- (2) The WHODAS validation study was an international multicenter observational study that enrolled 510 patients to confirm the psychometric properties of WHODAS in a diverse surgical cohort.<sup>3</sup>
- (3) The MeasurIng Disability After Surgery (MIDAS) study is an ongoing single-center registry that had included 868 patients at the time of this analysis (Alfred HREC 279/16). MIDAS enrolls all patients 70 yr of age or older having emergency or elective, cardiac and non-cardiac surgery at a tertiary Australian hospital. Patients completed WHODAS before surgery and by telephone with a trained interviewer at 3 and 6 months after surgery. Patients were provided information pamphlets and were able to opt out of having their data included in the registry. Patients were excluded if they refused to complete WHODAS before surgery; if surgery was time-critical; if they had poor English comprehension; or if there was known or suspected cognitive impairment, current psychiatric disease, or substance abuse.

## Measurement of Disability

All three studies measured disability using the 12-item version of WHODAS (see Supplemental Digital Content, fig. S1, <http://links.lww.com/ALN/C298>, the 12-item self-administered WHODAS 2.0) before surgery (baseline) and at 3 and 6 months after surgery. Each item asks about how

much difficulty the patient has had because of health problems in a specific functional domain over the past 30 days and is scored on a 5-point Likert scale: none = 0; mild = 1; moderate = 2; severe = 3; and extreme = 4. The total 12-item score, between 0 and 48, was then divided by 48 and multiplied by 100 to convert it, by linear transformation, to a percentage of the total possible score as previously described.<sup>3</sup>

Missing WHODAS items were handled according to the process described in the WHODAS manual.<sup>14</sup> For a single missing item, the score for this item was imputed using the average item score. If more than one item was missed, the total score was classified as missing data.

## Statistical Analysis

There is no agreed method of sample size determination for minimal clinically important difference studies, although previous studies have used less than 200 patients. We included three studies from our research group that use WHODAS to measure disability, with a combined sample size of 4,361 patients. We considered that this large, surgically diverse population would provide an accurate estimate of the minimal clinically important difference.

**Minimal Clinically Important Difference Estimation.** No prescribed methodology exists for minimal clinically important difference estimation.<sup>8,10,15</sup> Experts recommend that multiple approaches using a combination of anchor and distribution-based methods with triangulation (averaging) of results is the optimal method of minimal clinically important difference estimation,<sup>9,10</sup> acknowledging that each method has its strengths and limitations.<sup>16</sup>

**Distribution-based Minimal Clinically Important Difference Estimation.** Distribution-based methods use various measures of statistical distribution to estimate the minimal clinically important difference.<sup>8</sup> They are easy to perform and have been shown to correlate well with anchor-based estimates.<sup>17</sup> The disadvantage of distribution-based methods is that they do not contain an external reference, or anchor, to a patient experience or clinical event. As such, experts recommend that they should primarily be used to confirm the findings of anchor-based methods.<sup>10,18</sup>

We used three distribution-based methods proposed by Myles *et al.*<sup>19</sup>: 0.3 times the SD, the SEM, and 5% of the score range. The SEM was calculated as the SD multiplied by the square root of 1 minus the intraclass correlation coefficient.<sup>20</sup>

Because the minimal clinically important difference is sensitive to different population groups and clinical scenarios, a range of minimal clinically important difference estimates may exist for a given patient-centered outcome measure depending on the context in which it is used.<sup>10,15</sup> We conducted sensitivity analyses by comparing the minimal clinically important differences in women *versus* men, in older *versus* younger patients, in patients with or without a history of malignancy, and for different types of surgery. We

also stratified patients in the WHODAS validation cohort using a self-rated measure of health. This was achieved by splitting this cohort into three equal tertiles using patient's preoperative EuroQol-5D visual analog scores.<sup>21</sup>

**Anchor-based Minimal Clinically Important Difference Estimation.** Anchor-based methods estimate the minimal clinically important difference by relating a change in patient-centered outcome score to a change in clinical scenario or a change on a patient-reported global rating scale.<sup>15</sup> The global rating scales use Likert scales to rank the patient's improvement or deterioration, with the minimal clinically important difference equating to the mean change of the patient groups that "improving a little bit" or "becoming a little worse."<sup>15</sup> A limitation of this approach is that retrospective patients reports are subject to recall bias<sup>10</sup> with the patient's current state influencing their rating more than their previous state.<sup>22</sup>

We estimated the minimal clinically important difference using two anchor-based methods. First, the WHODAS validation study asked patients to rate the change in their health status at 3 and 6 months after surgery using two questions:

- (1) Did your surgery improve your daily life?
- (2) Did you feel better following surgery?

These questions were answered on a 5-point Likert scale: +2 (strongly agree), +1 (tend to agree), 0 (neither agree nor disagree), -1 (tend to disagree), and -2 (strongly disagree). If patients answered both questions with 1 or -1, this would be considered to be consistent with a change equivalent to the minimal clinically important difference. In patients meeting these criteria, the absolute change in WHODAS score could then be used to calculate an estimate of the minimal clinically important difference.

Second, all three studies measured unexpected readmission to hospital. This endpoint is often used because it signifies a clinically significant deterioration in health. It is also a patient-centered outcome measure, because most patients do not want to be readmitted to hospital after surgery. We used unexpected readmission to hospital at 3 months as a further anchor-based confirmation of the minimal clinically important difference. The three distribution and two anchor-based estimates were then averaged to reach a final minimal clinically important difference estimate. Multiple imputation was also conducted to assess the impact of missing WHODAS scores (see Methods of missing data assessment and Supplemental Digital Content, tables S1 to S3, <http://links.lww.com/ALN/C298>, which describe multiple imputation methods and data).

**Patient-acceptable Symptom State and Clinically Significant Disability Estimation.** The patient-acceptable symptom state score was estimated using data from the WHODAS validation study cohort. Patients who answered "tend to agree" or "strongly agree" to the question "Did your surgery improve your daily life?" were selected as being likely to have an acceptable symptom state with little to no significant

disability. In these patients, the patient-acceptable symptom state score was estimated as the 75th centile of WHODAS scores at 3 and 6 months, a method employed in previous studies.<sup>11,12,23</sup> This estimate was then compared with the 75th centile of the entire study cohort.

In contrast, the WHODAS score consistent with clinically significant (at least moderate) disability was estimated by two methods. Andrews *et al.*<sup>13</sup> estimated that the top 10% of WHODAS scores represents patients who are likely to have significant disability. We repeated this analysis in the entire study cohort, measuring the 90th centile at 3 and 6 months after surgery. A second method of estimating significant disability was made using the 75th centile of WHODAS scores at 3 and 6 months in patients who had been unexpectedly readmitted to hospital within that time frame.

The data are presented as means  $\pm$  SD or number (%) unless otherwise specified. The change in WHODAS scores from baseline to 6 months after surgery was compared with the paired Student's *t* test. Between-group comparisons for nonparametric data were made using the Mann-Whitney U test or Kruskal-Wallis test for multiple groups.

Internal consistency and responsiveness testing were performed on 3-month WHODAS scores. The standardized response mean was calculated in patients in the WHODAS validation study who at 3 months tended to disagree or strongly disagreed that surgery improved daily life and tended to disagree or strongly disagreed that they felt better after surgery. The standardized response mean was calculated as the mean change in WHODAS score between baseline and 3 months, divided by the SD of the change.

All analysis were undertaken using SPSS v.25. A *P* value of less than 0.05 was considered statistically significant. There was no correction for multiple comparisons.

## Results

Patient demographics (table 1) are presented using the combined data of 4,361 patients from the RELIEF, WHODAS validation, and MIDAS studies. The mean age of patients was 67 (range, 18 to 103) years and 45% of patients were female. Most patients had an American Society of Anesthesiologists (Schaumburg, Illinois; ASA) Physical Status score of II (35%) or III (54%), and a high proportion of patients had a history of malignancy (49%), with 10% having local or distant metastases. The majority of surgery was elective (91%), and the most common type of surgery was general abdominal surgery (59%). Clinically significant disability was present in 21% of patients before surgery, and 12% of patients were admitted to intensive care after surgery.

Mean WHODAS scores, indicating more disability, tended to be higher in patients with a higher ASA Physical Status score (table 2), preoperatively and at 3 and 6 months after surgery ( $P < 0.0005$  for trend at each time point). As patients recovered from surgery, mean WHODAS scores improved (became lower) from baseline to 6 months, with a mean difference of 1% (95% CI, 1 to 2%;  $P < 0.0005$ ).

**Table 1.** Patient Demographic and Surgical Characteristics by Study Cohort: REstrictive *versus* LibEral Fluid Therapy in Major Abdominal Surgery (RELIEF) Study<sup>4</sup>; World Health Organization Disability Assessment Schedule (WHODAS) Validation Study<sup>3</sup>; and Measuring Disability After Surgery (MIDAS) Study

| Variable                              | RELIEF<br>N = 2,983 | WHODAS<br>N = 510 | MIDAS<br>N = 868 | Full Cohort<br>N = 4,361 |
|---------------------------------------|---------------------|-------------------|------------------|--------------------------|
| Age, yr                               |                     |                   |                  |                          |
| Means ± SD                            | 66 ± 13             | 56 ± 15           | 77 ± 6           | 67 ± 13                  |
| Range                                 | 19–94               | 18–90             | 70–103           | 18–103                   |
| Female sex                            | 1,429 (48)          | 212 (42)          | 338 (39)         | 1,979 (45)               |
| Body mass index (kg·m <sup>-2</sup> ) | 31.3 ± 8.7          | 27.2 ± 6.7        | 28.1 ± 5.2       | 30.3 ± 8.2               |
| Preexisting medical condition         |                     |                   |                  |                          |
| Current smoker                        | 398 (13)            | 96 (19)           | 56 (7)           | 550 (13)                 |
| Hypertension                          | 1,807 (61)          | 207 (41)          | 655 (76)         | 2,669 (61)               |
| Ischemic heart disease                | 462 (16)            | 67 (13)           | 290 (33)         | 819 (19)                 |
| Previous myocardial infarction        | 268 (9)             | 39 (8)            | 90 (10)          | 397 (9)                  |
| Cardiac failure                       | 104 (4)             | 25 (5)            | 197 (23)         | 326 (8)                  |
| Stroke or transient ischemic attack   | 220 (7)             | 33 (7)            | 93 (11)          | 346 (8)                  |
| Asthma or COPD                        | 498 (17)            | 81 (16)           | 145 (17)         | 724 (17)                 |
| Diabetes                              | 875 (29)            | 70 (14)           | 190 (22)         | 1,135 (26)               |
| Cancer                                | 1,881 (63)          | 181 (36)          | 91 (11)          | 2,153 (49)               |
| Metastatic                            | 249 (8)             | 41 (8)            | 25 (3)           | 315 (7)                  |
| ASA Physical Status                   |                     |                   |                  |                          |
| I                                     | 46 (2)              | 86 (17)           | 16 (2)           | 148 (3)                  |
| II                                    | 1,082 (36)          | 207 (41)          | 243 (29)         | 1,532 (35)               |
| III                                   | 1,717 (58)          | 188 (37)          | 422 (50)         | 2,327 (54)               |
| IV                                    | 138 (5)             | 26 (5)            | 168 (20)         | 332 (8)                  |
| V                                     | 0                   | 0                 | 1                | 1                        |
| Type of surgery                       |                     |                   |                  |                          |
| Cardiac                               |                     | 50 (10)           | 180 (20)         | 230 (5)                  |
| Thoracic                              |                     | 60 (12)           | 33 (4)           | 93 (2)                   |
| Orthopedic                            |                     | 93 (18)           | 92 (11)          | 185 (4)                  |
| General/abdominal                     | 2,266 (76)          | 175 (34)          | 111 (13)         | 2,552 (59)               |
| Urology/gynecological                 | 717 (24)            | 33 (7)            | 23 (3)           | 773 (18)                 |
| Plastic                               |                     | 11 (2)            | 198 (23)         | 209 (5)                  |
| Neurosurgery                          |                     | 50 (10)           | 97 (11)          | 147 (3)                  |
| Vascular                              |                     | 20 (4)            | 75 (9)           | 95 (2)                   |
| Ear nose and throat                   |                     | 16 (3)            | 50 (6)           | 66 (2)                   |
| Faciomaxillary                        |                     | 2                 | 9 (1)            | 11 (1)                   |
| Nonelective                           | 211 (7)             | 42 (8)            | 155 (18)         | 408 (9)                  |
| Intensive care after surgery          | 226 (8)             | 84 (17)           | 217 (25)         | 527 (12)                 |
| Preoperative disability*              | 516 (17)            | 115 (23)          | 309 (36)         | 938 (21)                 |

The values are means ± SD or numbers (%).

\*Clinically significant disability is defined as a WHODAS score of at least 25%. Denominator (n) = 4,266.

ASA, American Society of Anesthesiologists; COPD, chronic obstructive pulmonary disease.

## Minimal Clinically Important Difference Estimation

Distribution-based estimates were made using baseline WHODAS scores from 4,266 patients. The score for a single item was imputed for three patients. WHODAS scores were missing in 95 patients, with 81 of these from patients enrolled in the WHODAS validation study before WHODAS incorporation at baseline at that study site.<sup>3</sup>

The distribution-based estimates of the minimal clinically important difference (table 3) were similar for SD, SEM, and 5% of instrument range methods, with an average minimal clinically important difference estimate of 5% in the entire study population. Sensitivity analysis found that minimal clinically important difference estimates were slightly higher for subgroups with a higher rate of

baseline disability, including patients with lower baseline EuroQoL-5D visual analog scores and patients having neurosurgery or orthopedic surgery (table 3). However, minimal clinically important difference estimates were similar for men, women, older (at least 70 yr of age) and younger (less than 70 yr of age) patients, and patients with or without a history of malignancy (table 3).

Anchor-based estimates of the minimal clinically important difference, based on patient-reported changes in health status and 3-month hospital readmission, were similar to distribution-based estimates (table 4). The average of the mean differences from the five methods of anchor-based estimation was 5%. In contrast, the mean difference in WHODAS scores between baseline and 3 months in patients not readmitted to the hospital within 3 months of surgery was -1%.

**Table 2.** Mean WHODAS Scores at Baseline and 3 and 6 Months

| ASA Physical Status | Baseline |                 | 3 Months |                 | 6 Months |                 |
|---------------------|----------|-----------------|----------|-----------------|----------|-----------------|
|                     | n        | WHODAS Score, % | n        | WHODAS Score, % | n        | WHODAS Score, % |
| I                   | 138      | 10 ± 15         | 130      | 6 ± 12          | 124      | 5 ± 10          |
| II                  | 1,493    | 10 ± 14         | 1,358    | 11 ± 15         | 1,313    | 9 ± 15          |
| III                 | 2,289    | 16 ± 17         | 1,978    | 15 ± 18         | 1,903    | 14 ± 17         |
| IV                  | 325      | 23 ± 19         | 233      | 16 ± 20         | 212      | 15 ± 17         |
| Total               | 4,245    | 14 ± 16         | 3,699    | 13 ± 17         | 3,552    | 12 ± 16         |

The table compares WHODAS scores by ASA Physical Status. Each of the 12 WHODAS items asks about how much difficulty the patient has had because of health problems in a specific functional domain over the past 30 days and is scored on a 5-point Likert scale: none = 0; mild = 1; moderate = 2; severe = 3; and extreme = 4. The total 12-item score, between 0 and 48, was then divided by 48 and multiplied by 100 to convert it to a percentage score.<sup>3</sup> *P* < 0.0005 at each time point. The values are means ± SD.

ASA, American Society of Anesthesiologists; WHODAS, 12-item World Health Organization Disability Assessment Schedule.

**Table 3.** Distribution-based Estimates of the Minimal Clinically Important Difference in WHODAS Scores Measured at Baseline (Preoperatively) in All Patients (n = 4,266)

|                        | Baseline Disability, %* | 0.3 SD | SEM | 5% of Range | Average |
|------------------------|-------------------------|--------|-----|-------------|---------|
| Total population       | 22                      | 5      | 6   | 5           | 5       |
| Sex                    |                         |        |     |             |         |
| Female                 | 26                      | 5      | 6   | 5           | 5       |
| Male                   | 18                      | 5      | 5   | 5           | 5       |
| Age                    |                         |        |     |             |         |
| ≥ 70 yr of age         | 23                      | 5      | 6   | 5           | 5       |
| < 70 yr of age         | 21                      | 5      | 6   | 4           | 5       |
| Baseline EQ-5D VAS†    |                         |        |     |             |         |
| < 65 (n = 126)         | 56                      | 6      | 8   | 4           | 6       |
| 65 to 85 (n = 151)     | 23                      | 5      | 6   | 4           | 5       |
| > 85 (n = 142)         | 6                       | 3      | 4   | 3           | 4       |
| History of malignancy  |                         |        |     |             |         |
| Yes                    | 14                      | 4      | 5   | 5           | 5       |
| No                     | 30                      | 5      | 6   | 5           | 6       |
| Type of surgery        |                         |        |     |             |         |
| Thoracic (n = 86)      | 24                      | 5      | 6   | 4           | 5       |
| Neurosurgery (n = 139) | 53                      | 6      | 6   | 5           | 6       |
| Cardiac (n = 225)      | 33                      | 5      | 6   | 4           | 5       |
| Orthopedic (n = 159)   | 58                      | 6      | 7   | 4           | 6       |
| General (n = 2,534)    | 18                      | 4      | 6   | 5           | 5       |
| Urology (n = 766)      | 15                      | 4      | 5   | 3           | 4       |
| Plastics (n = 198)     | 25                      | 5      | 5   | 4           | 5       |

Sensitivity analysis was conducted according to patient and surgical factors.

\*Baseline disability is the proportion of patients with clinically significant disability before surgery, defined as a WHODAS score of at least 25%.<sup>3</sup> †The baseline EQ-5D VAS was only measured in the WHODAS validation cohort. The WHODAS validation cohort was split into three equal tertiles according to the baseline EuroQol-5D VAS score (<65, 65 to 85, and >85).

EQ-5D VAS, EuroQol-5D visual analog score; WHODAS, 12-item World Health Organization Disability Assessment Schedule.

Triangulating the average distribution-based minimal clinically important difference estimate (5%; table 3) and five anchor-based minimal clinically important difference estimates (table 4), we reached a final minimal clinically important difference estimate of 5%. Minimal clinically important difference estimates were similar when multiple imputation was conducted to account for missing data (see Supplemental Digital Content, tables S2 and S3, <http://links.lww.com/ALN/C298>, which are multiply imputed data set versions of tables 3 and 4). Using this minimal

clinically important difference value to quantify the change in disability from baseline to 6 months after surgery, we concluded that 750 patients (21.4%) had a significant increase in disability, 1,060 patients (30.3%) had a significant decrease in disability, and 1,687 patients (48.2%) had no significant change in disability.

Cronbach's  $\alpha$  (internal consistency) of the WHODAS score was 0.90. The standardized response mean (responsiveness) of WHODAS was 0.5. The scaling properties are demonstrated in figure 1, with 30% of patients having a

**Table 4.** Anchor-based Estimates of the Minimal Clinically Important Difference in WHODAS Scores from Patient-reported Change in Health Status at 3 and 6 Months after Surgery and 3-Month Hospital Readmission Data

| “Surgery improved my daily life” | Baseline Score | Score at 3 or 6 Months | Mean Difference |
|----------------------------------|----------------|------------------------|-----------------|
| Tend to agree at 3 months        | 16 (n = 69)    | 11 (n = 69)            | -5              |
| Tend to agree at 6 months        | 14 (n = 76)    | 9 (n = 81)             | -4              |
| Tend to disagree at 3 months     | 14 (n = 24)    | 18 (n = 26)            | 4               |
| Tend to disagree at 6 months     | 18 (n = 21)    | 23 (n = 24)            | 5               |
| 3-Month hospital readmission     | 17 (n = 551)   | 23 (n = 525)           | 6               |

Patient-reported change in health status data were from the initial WHODAS validation article.<sup>3</sup> Patients classified as “Tend to agree” were those who tended to agree that surgery had improved their daily lives and that they felt better after surgery at the given time point after surgery. Patients classified as “Tend to disagree” were those who tended to disagree that surgery had improved their daily lives and that they felt better after surgery at the given time point after surgery. Data regarding 3-month hospital readmission were from all three studies included in the primary analysis. Patients included in this analysis were anyone who was readmitted to hospital within 3 months of their index surgery.

WHODAS, 12-item World Health Organization Disability Assessment Schedule.

score of 0, and 84% of patients having a WHODAS score of less than 25% (table 5). Median WHODAS scores were significantly higher in patients who were readmitted within 3 or 6 months after surgery, compared with patients who were not ( $P < 0.0005$  for both; see Supplemental Digital Content, table S4, <http://links.lww.com/ALN/C298>, which describes median WHODAS scores after surgery).

### Patient-acceptable Symptom State Estimation

For patients selected as likely to have a patient-acceptable symptom state, the 75th centile for WHODAS scores was 17% (n = 255) at 3 months and 15% (n = 256) at 6 months after surgery, with an average estimate score of 16%. In contrast, the 75th centile for WHODAS scores in the entire study cohort was higher, being 19% at 3 months

and 17% at 6 months after surgery (average 18%). Using a rounded patient-acceptable symptom state score estimate of less than 16% to define a disability-free population, the disability-free survival rate was 73.2% 6 months after surgery (see Supplemental Digital Content, table S5, <http://links.lww.com/ALN/C298>, which describes the proportion of patients with various levels of disability after surgery).

### Clinically Significant Disability Estimation

The WHODAS score representing clinically significant (at least moderate) disability was estimated by two methods: (1) the 90<sup>th</sup> centile for WHODAS scores in the entire

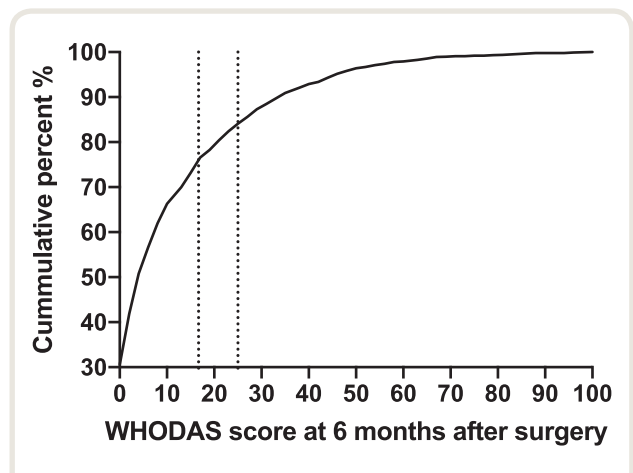

**Fig. 1.** The cumulative percentage of World Health Organization Disability Assessment Schedule (WHODAS) scores at 6 months after surgery. The two dotted lines refer to the 75th centile for the WHODAS score at 6 months after surgery (left-hand dotted line; 16.7%) and the centile (right-hand dotted line; 84th) corresponding to the WHODAS score previously used to define clinically significant disability.<sup>3</sup>

**Table 5.** WHODAS Scores at 6 Months: Population Percentile

| WHODAS Score | Population Percentile, % | Readmission to Hospital, %* |
|--------------|--------------------------|-----------------------------|
| 0            | 30.6                     | 7.6                         |
| 2            | 41.9                     | 7.6                         |
| 4            | 50.8                     | 8.9                         |
| 6            | 56.6                     | 9.9                         |
| 8            | 62                       | 10.6                        |
| 10           | 66.3                     | 10.9                        |
| 13           | 70                       | 11.3                        |
| 16.7         | 75                       | 11.5                        |
| 19           | 78.3                     | 11.7                        |
| 21           | 80.4                     | 12.1                        |
| 25           | 84.1                     | 12.5                        |
| 31           | 88.5                     | 12.8                        |
| 35           | 90.9                     | 13.2                        |
| 40           | 92.9                     | 14.0                        |
| 50           | 96.4                     | 14.5                        |
| 60           | 97.9                     | 14.7                        |
| 70           | 99                       | 14.8                        |
| 80           | 99.3                     | 14.9                        |
| 90           | 99.8                     | 15.1                        |
| 100          | 100                      | 15.2                        |

\*Readmission to hospital was calculated as the percentage of patients from the entire study cohort who completed the WHODAS score 6 months after surgery that were readmitted to hospital within 6 months of their index surgery.

WHODAS, 12-item World Health Organization Disability Assessment Schedule.

cohort, which was 38% at 3 months and 35% at 6 months after surgery, and (2) the 75th centile for WHODAS scores in patients readmitted within 3 or 6 months after surgery, which was 33% at 3 months and 33% at 6 months after surgery. Using these four WHODAS scores, the average estimated WHODAS score to represent clinically significant disability was 35%. Using this definition, 367 patients (10%) had clinically significant disability 6 months after surgery (see Supplemental Digital Content, table S4, <http://links.lww.com/ALN/C298>, which describes median WHODAS scores after surgery).

## Discussion

We estimate that the minimal clinically important difference for WHODAS in surgical patients is 5%. This means that when converting the WHODAS score to a percentage scale for patients having surgery, a change in WHODAS score of 5% or more is consistent with a clinically meaningful increase or decrease in their level of disability. In perioperative research, this value can be used to define a significant change in disability in response to a treatment and can also be used to define new disability in conjunction with an absolute WHODAS value above which significant disability is defined.

Distribution-based minimal clinically important difference estimates varied minimally in patients with higher or lower rates of preoperative disability but were otherwise consistent between different patient groups. Furthermore, repeated distribution and anchor-based estimates using multiple imputation methods for missing data were very similar to original estimates. It is therefore likely that the minimal clinically important difference estimate of 5% is an accurate assessment of the true minimal clinically important difference and generalizable to most surgical settings and patient populations.

This study confirmed the findings of the WHODAS validation study that patients with a higher ASA score tended to have higher WHODAS scores and the postoperative trajectory in WHODAS scores, with most patients tending to recover with time and WHODAS scores being lowest at 6 months after surgery (table 2).<sup>3</sup> We estimated that a WHODAS score of less than 16% is consistent with a patient-acceptable symptom state and that a WHODAS score of at least 35% can be used to define a patient with clinically significant (at least moderate) disability. This differs from our previously published recommendation that clinically significant disability should be defined as a WHODAS score of at least 25% and that anyone with a WHODAS score of less than 25% could be considered disability-free. We believe these new definitions are more accurate and applicable to clinical practice and research for several reasons. The previous definition was based on data from the general population<sup>13,14</sup> rather than a surgical cohort, where a WHODAS score of at least 25% was considered to be consistent with at least moderate disability. The problem

with this definition is that it uses a single point from a continuous scale to create a binary outcome. It follows that the population considered to be disability-free then may have included some patients with mild disability. In contrast, the new definitions classify two populations: one that has an acceptable symptom state and can therefore be considered disability-free and another with clinically significant disability that is more likely to be associated with ongoing health problems and hospital readmissions. Patients that do not fit into either category (having a WHODAS score between 16 and 35%) can be considered as having mild disability.

The patient-centered outcomes subgroup of the StEP-COMPAC working group has recommended that the 12-item version of WHODAS be included to measure disability as a standard clinical trial endpoint. We recommend the following specific scoring definitions:

- *Minimal clinically important difference*: increase or decrease on WHODAS score of at least 5%
- *Disability-free survival*: alive with a WHODAS score less than 16%
- *Clinically significant disability*: WHODAS score of at least 35%
- *New onset clinically significant disability*: increase in WHODAS score of at least 5% to a final WHODAS score of at least 35%

This study has some limitations. This was a retrospective analysis of prospectively collected data from three studies, each with a distinct patient population. In particular, the RELIEF study represents a cohort of patients predominantly undergoing abdominal surgery, and the MIDAS study only includes patients 70 yr of age or older. It is therefore possible that the minimal clinically important difference and patient-acceptable symptom state estimates are biased toward these two populations. However, sensitivity analysis demonstrated that averaged distribution-based minimal clinically important difference estimates were similar in patients having different types of surgery and in patients with varying degrees of preoperative and postoperative disability, suggesting that the estimated minimal clinically important difference is generalizable rather than specific to the included cohorts.

We also used anchor questions from the initial WHODAS validation study. These questions were not specifically designed for this minimal clinically important difference and patient-acceptable symptom state analysis and also limited any anchor-based analysis to the smaller WHODAS validation population. However, we believe the anchor question has face validity for minimal clinically important difference and patient-acceptable symptom state estimation, and studies of this kind are frequently conducted in populations smaller than the WHODAS validation population. Further, the WHODAS validation cohort was diverse, including elective, emergency, cardiac, noncardiac, and day-stay surgery. Finally, the anchor-based

estimates were very similar to the distribution-based estimates, further confirming the appropriateness of using these anchor questions.

In conclusion, we have determined the minimal clinically important difference and patient-acceptable symptom state for the WHODAS scale in surgical patients. We have proposed definitions that can be incorporated into future clinical research and audit in line with the proposed inclusion of WHODAS as a standardized measure of perioperative outcome.

## Research Support

Supported by a project grant from The Australian and New Zealand College of Anaesthetists (Melbourne, Victoria, Australia).

## Competing Interests

The authors declare no competing interests.

## Correspondence

Address correspondence to Dr. Shulman: Alfred Hospital, Commercial Road, Melbourne, Victoria 3004, Australia. [m.shulman@alfred.org.au](mailto:m.shulman@alfred.org.au). This article may be accessed for personal use at no charge through the Journal Web site, [www.anesthesiology.org](http://www.anesthesiology.org).

## References

1. Kalkman CJ, Kappen TH: Patient-centered endpoints for perioperative outcomes research. *ANESTHESIOLOGY* 2015; 122:481–3
2. Shulman M, Myles P: Measuring perioperative outcome. *Curr Opin Anaesthesiol* 2016; 29:733–8
3. Shulman MA, Myles PS, Chan MT, McLroy DR, Wallace S, Ponsford J: Measurement of disability-free survival after surgery. *ANESTHESIOLOGY* 2015; 122:524–36
4. Myles PS, Bellomo R, Corcoran T, Forbes A, Peyton P, Story D, Christophi C, Leslie K, McGuinness S, Parke R, Serpell J, Chan MTV, Painter T, McCluskey S, Minto G, Wallace S; Australian and New Zealand College of Anaesthetists Clinical Trials Network and the Australian and New Zealand Intensive Care Society Clinical Trials Group: Restrictive *versus* liberal fluid therapy for major abdominal surgery. *N Engl J Med* 2018; 378:2263–74
5. Neuman MD, Ellenberg SS, Sieber FE, Magaziner JS, Feng R, Carson JL; REGAIN Investigators: REgional *versus* General Anesthesia for promoting INdependence after hip fracture (REGAIN): Protocol for a pragmatic, international multicentre trial. *BMJ Open* 2016; 6:e013473
6. Short TG, Leslie K, Chan MT, Campbell D, Frampton C, Myles P: Rationale and design of the balanced anesthesia study: A prospective randomized clinical trial of two levels of anesthetic depth on patient outcome after major surgery. *Anesth Analg* 2015; 121:357–65
7. Shulman MA, Cuthbertson BH, Wijeyesundera DN, Pearse RM, Thompson B, Torres E, Ambosta A, Wallace S, Farrington C, Myles PS; Measurement of Exercise Tolerance for Surgery Study Investigators: Using the 6-minute walk test to predict disability-free survival after major surgery. *Br J Anaesth* 2019; 122:111–9
8. Wijeyesundera DN, Johnson SR: How much better is good enough?: Patient-reported outcomes, minimal clinically important differences, and patient acceptable symptom states in perioperative research. *ANESTHESIOLOGY* 2016; 125:7–10
9. Wells G, Beaton D, Shea B, Boers M, Simon L, Strand V, Brooks P, Tugwell P: Minimal clinically important differences: Review of methods. *J Rheumatol* 2001; 28:406–12
10. Revicki D, Hays RD, Cella D, Sloan J: Recommended methods for determining responsiveness and minimally important differences for patient-reported outcomes. *J Clin Epidemiol* 2008; 61:102–9
11. Kvien TK, Heiberg T, Hagen KB: Minimal clinically important improvement/difference (MCII/MCID) and patient acceptable symptom state (PASS): What do these concepts mean? *Ann Rheum Dis* 2007; 66:iii40–1
12. Salaffi F, Carotti M, Gutierrez M, Di Carlo M, De Angelis R: Patient acceptable symptom state in self-report questionnaires and composite clinical disease index for assessing rheumatoid arthritis activity: Identification of cut-off points for routine care. *BioMed Research International* 2015; 2015:1–8
13. Andrews G, Kemp A, Sunderland M, Von Korff M, Ustun TB: Normative data for the 12 item WHO Disability Assessment Schedule 2.0. *PLoS One* 2009; 4:e8343
14. Ustun TB, Kostanjsek N, Chatterji S, Rehm J: Measuring health and disability: Manual for WHO Disability Assessment Schedule (WHODAS 2.0). Geneva, World Health Organization, 2010, pp 1–88
15. King MT: A point of minimal important difference (MID): A critique of terminology and methods. *Exp Rev Pharmacoecon Outcomes Res* 2014; 11:171–84
16. Guyatt GH, Osoba D, Wu AW, Wyrwich KW, Norman GR; Clinical Significance Consensus Meeting Group: Methods to explain the clinical significance of health status measures. *Mayo Clin Proc* 2002; 77:371–83
17. Wyrwich KW: Minimal important difference thresholds and the standard error of measurement: Is there a connection? *J Biopharm Stat* 2004; 14:97–110
18. Hays RD, Farivar SS, Liu H: Approaches and recommendations for estimating minimally important



- differences for health-related quality of life measures. *COPD* 2005; 2:63–7
19. Myles PS, Myles DB, Galagher W, Chew C, MacDonald N, Dennis A: Minimal clinically important difference for three quality of recovery scales. *ANESTHESIOLOGY* 2016; 125:39–45
  20. Wyrwich KW, Tierney WM, Wolinsky FD: Further evidence supporting an SEM-based criterion for identifying meaningful intra-individual changes in health-related quality of life. *J Clin Epidemiol* 1999; 52:861–73
  21. Herdman M, Gudex C, Lloyd A, Janssen M, Kind P, Parkin D, Bonsel G, Badia X: Development and preliminary testing of the new five-level version of EQ-5D (EQ-5D-5L). *Qual Life Res* 2011; 20:1727–36
  22. Streiner DL, Norman GR: *Health Measurement Scales: A Practical Guide to Their Development and Use*, 4th edition. New York, Oxford University Press, 2008, pp 1–423
  23. Myles PS: Clinically important difference in quality of recovery scores. *Anesth Analg* 2016; 122:13–4

## ANESTHESIOLOGY REFLECTIONS FROM THE WOOD LIBRARY-MUSEUM

# Benjamin Harrison Awakens a Navy Anesthetized by America's Apathy and Complacency

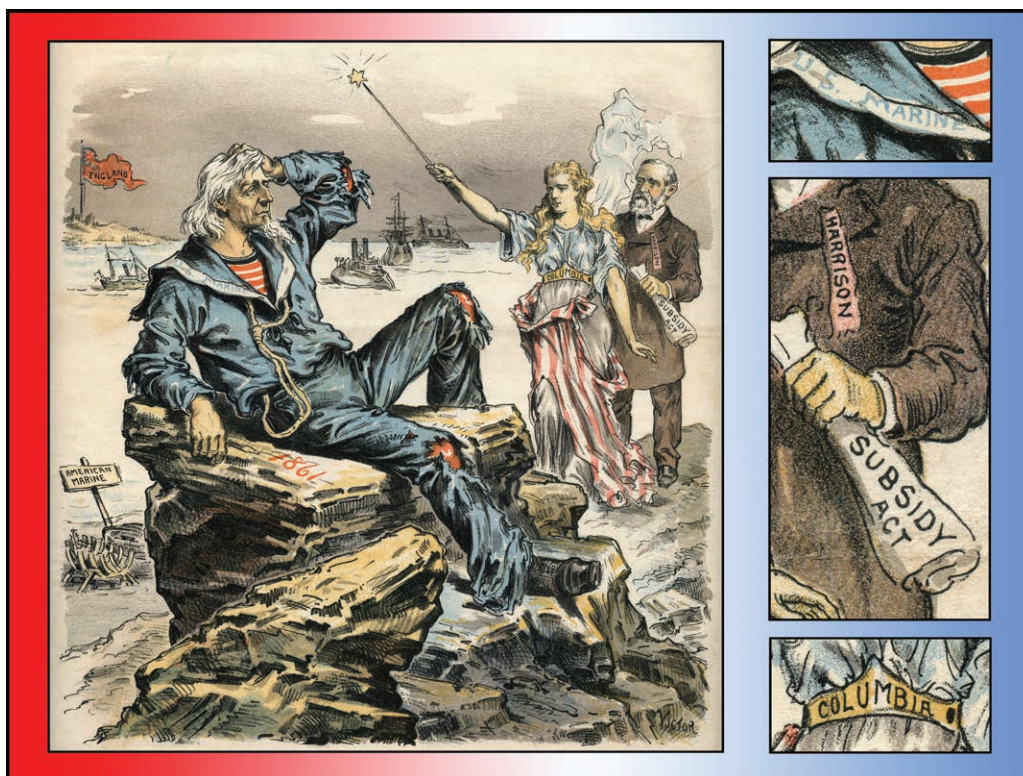

Union victories at sea during America's Civil War were followed by three decades of financial neglect of the United States Navy. Apathy and Complacency combined as powerful anesthetics to naval funding by six consecutive presidential administrations. When a seventh president, Benjamin Harrison (1833 to 1901; U.S. president, 1889 to 1893), finally championed modernizing the U.S. Navy, he was featured gallantly in 1891 by *Judge* on one of that satirical magazine's cover pictorials. On a rocky outcropping dated "1861," a drowsy sailor is identified as a "U.S. Marine" (*upper right*). A pair of rescuers (*left*) approaches him: the wand-wielding "Columbia" (identified *lower right*, symbolizing the United States) and President Benjamin Harrison. The latter clutches a scrolled copy of his Subsidy Act (*middle right*), which bankrolled the building of postal ships designed for ready conversion into naval warships. Many of the latter would contribute to the U.S. victory in the Spanish-American War. (Copyright © the American Society of Anesthesiologists' Wood Library-Museum of Anesthesiology.)

Melissa L. Coleman, M.D., Penn State College of Medicine, Hershey, Pennsylvania, and George S. Bause, M.D., M.P.H., Case Western Reserve University, Cleveland, Ohio.
